# Supplementary material
Source: PubMed Central journal article supplement (PMC2774009)

# Supporting Information

Sears et. al. 10.1073/pnas.0903032106

## SI Text

**Human Subject Studies.** The pioglitazone study included eight NR<sub>d</sub> subjects (age  $42 \pm 5$  [SE] yr, BMI  $23.1 \pm 0.6$  [SE] kg/m<sup>2</sup>) and 17 IR<sub>d</sub> subjects (age  $51 \pm 2$  yr, BMI  $36.4 \pm 1.5$  kg/m<sup>2</sup>). The rosiglitazone study included 19 IR<sub>d</sub> subjects (age  $52 \pm 2$  yr, BMI  $35.6 \pm 1.4$  kg/m<sup>2</sup>). The troglitazone study included 11 NR<sub>d</sub> subjects (age  $48 \pm 2$  yr, BMI  $25.8 \pm 1.2$  kg/m<sup>2</sup>) and 17 IR<sub>d</sub> subjects (age  $50 \pm 2$  yr, BMI  $34.4 \pm 1.3$  kg/m<sup>2</sup>). At baseline, each subject underwent a 5 hr 60–80 mU/m<sup>2</sup>/min hyperinsulinemic-euglycemic clamp (23, 29). After completing the baseline studies, all subjects were treated for 12 wk with pioglitazone (45 mg daily), rosiglitazone (4 mg twice daily), or troglitazone (600 mg daily). Needle biopsies of abdominal subcutaneous adipose tissue were taken in the basal state, before each clamp. Needle biopsies of vastus lateralis skeletal muscle were taken in the basal state (before each clamp) and the insulin-stimulated state (immediately before termination of each hyperinsulinemic-euglycemic clamp). Biopsies were flash-frozen in liquid nitrogen and stored at  $-80^{\circ}\text{C}$ . A schematic of the biopsy, clamp, and TZD treatment study design is shown in Fig. 1A. The experimental protocol was approved by the Institutional Review Board for Human Subjects of the University of California, San Diego. The methods used for hyperinsulinemic-euglycemic clamps were performed as described previously (29–32). All subjects were volunteers, generally healthy with normal liver and kidney function. Exclusion criteria were active cardiac, liver, or renal disease or long-term complications from diabetes. None of the nondiabetic subjects were taking medications that alter glucose tolerance. Diabetic subjects taking anti-diabetes medications (sulfonylurea or metformin) were asked to discontinue their medications for at least 2 weeks before initiating their baseline studies. None were previously receiving TZD therapy. All subjects received nutrition counseling regarding diet regulation during the studies.

**Hyperinsulinemic-Euglycemic Clamps.** Baseline blood samples were drawn and hyperinsulinemic-euglycemic clamps were performed in the morning after a 10 h overnight fast, as described in refs. 29 and 30. The rates of total glucose appearance and disposal ( $R_d$ ) were calculated from the tracer [ $3\text{-}^3\text{H}$ ]glucose data using the non-steady-state equations of Steele (31). A distribution volume of 0.19 L/kg and pool fraction of 0.5 were used in the calculations (32). Exogenous glucose infusion (Ginf) rates were used as an approximation for  $R_d$  for 10 subjects (5 NR<sub>d</sub> and 5 IR<sub>d</sub>) because a defective tracer batch prevented calculation of  $R_d$ . Ginf rates are approximately equal to  $R_d$  when  $>6$  mg/kg per min (8 of these 10 subjects) and slightly over estimate  $R_d$  when very low (2 of these 10 subjects). Plasma FFA levels were determined using an acyl-CoA oxidase-based colorimetric kit (NEFA-C) with intra- and inter-assay coefficients of variation (CVs) of 2.4 and 3.3%, respectively. Plasma insulin was measured by a double-antibody technique (33). The intra- and inter-assay CVs were 3.7 and 9.2%, respectively.

**Microarray Studies.** RNA from 364 adipose tissue and skeletal muscle biopsies was isolated and gene expression patterns in each sample were determined using Affymetrix Human Genome U133 Plus 2.0 oligonucleotide microarrays (Affymetrix, Inc., Santa Clara, CA) which include  $>47,000$  transcript features. Total RNA samples were isolated and processed as recommended by Affymetrix (Affymetrix GeneChip

Expression Analysis Technical Manual) from 50 to 100 mg of tissue using TRIzol Reagent (Invitrogen). RNA concentrations were adjusted to a final concentration of  $1.25 \mu\text{g}/\mu\text{L}$ . Further RNA processing and microarray analyses were conducted at the University of California Irvine DNA & Protein MicroArray Facility. RNA samples were quality assessed before beginning target preparation/processing steps by running out a small amount of each sample (typically 25–250 ng per well) onto a RNA Lab-On-A-Chip (Caliper Technologies) that was evaluated on an Agilent Bioanalyzer 2100 (Agilent Technologies). Single-stranded, then double-stranded cDNA was synthesized from the poly(A)<sup>+</sup> mRNA present in the isolated total RNA (typically 10  $\mu\text{g}$  total RNA starting material each sample reaction) using the SuperScript Double-Stranded cDNA Synthesis Kit (Invitrogen) and poly (T)-nucleotide primers that contained a sequence recognized by T7 RNA polymerase. A portion of the resulting ds cDNA was used as a template to generate biotin-tagged cRNA from an in vitro transcription reaction (IVT), using the Affymetrix GeneChip IVT Labeling Kit. 15  $\mu\text{g}$  of biotin-tagged cRNA was fragmented (average length 100 bases, range 35–200 bases) following prescribed protocols (Affymetrix GeneChip Expression Analysis Technical Manual). 10  $\mu\text{g}$  of fragmented target cRNA was hybridized ( $45^{\circ}\text{C}$  with rotation for 16 h, Affymetrix GeneChip Hybridization Oven 640) to probe sets present on an Affymetrix Human Genome U133 Plus 2.0 array. The GeneChip arrays were washed and stained (SAPE, streptavidin-phycoerythrin) on an Affymetrix Fluidics Station 450, then scanned on a GeneChip Scanner 3000. Hybridization results were quantified and analyzed using GCOS 1.2 software (Affymetrix) using default values (Scaling, Target Signal Intensity = 500; Normalization, All Probe Sets; Parameters, all set at default values). Gene expression levels, expressed as average difference scores, were determined using Affymetrix MAS 5.0 software. Semi-quantitative RT-PCR evaluation of several differentially expressed genes correlated with validated microarray expression data ( $r_{\text{avg}} = 0.83$ ,  $r_{\text{range}} = 0.68\text{--}0.98$ ).

**Statistical Analyses.** Clinical characteristics data were analyzed using Student's *t* test (paired and unpaired, as appropriate) and a statistical cutoff of  $P < 0.05$ . We applied our Variance Modeled Posterior Inference with Regional Exponentials (VAMPIRE) microarray analysis web suite to the gene expression data to identify significant differences between gene expression profiles from the subject groups. We identified statistically enriched of Gene Ontology (ver. 200704) functional annotation terms in expression data sets using GOby. We used variance-balanced regression and Pearson correlation coefficients to conduct our regression analyses. Variance-balanced regression is a weighted least squares method where the weights are based on the inverse of the estimate of variance, as computed by VAMPIRE. We conducted two regression line comparisons using the F-test statistic for coincidence of two regression lines. We used the Chi-square test statistic where indicated. We corrected for family-wise error associated with multiple comparisons (accounting for the number of probe sets or genes examined) using the stringent Bonferroni correction at a 5% significance level cutoff ( $\alpha_{\text{Bonf}} = 0.05$ ).

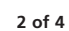

Supplement: 0903032106_0903032106SI.pdf [file 0903032106_0903032106SI.pdf]
